# Supplementary material for: Body Shape Index Is a Stronger Predictor of Diabetes
Source: PubMed Central journal article supplement (PMC6566958; doi:10.3390/nu11051018), 2019-05-07
Supplement: nutrients-11-01018-s001.pdf [file nutrients-11-01018-s001.pdf]

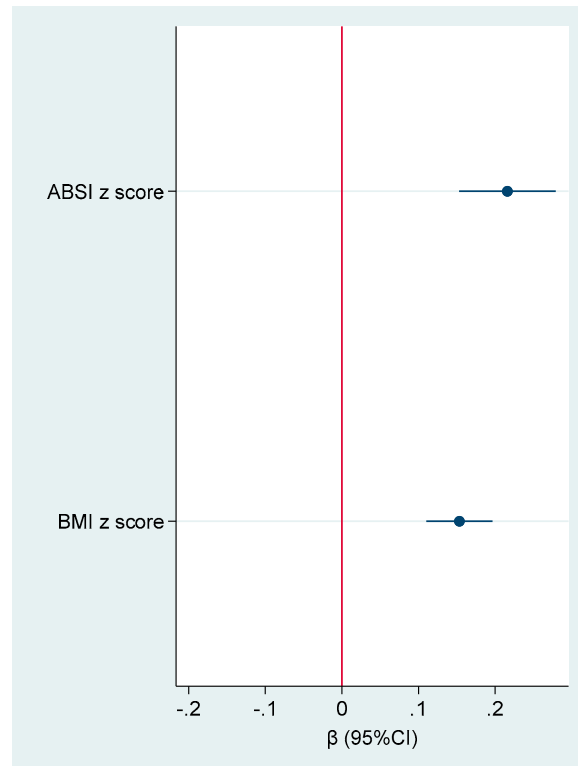

**Figure S1.** Association between ABSI, BMI and HbA1c; Model adjusted for age and gender. ABSI and BMI were mutually adjusted.

**Table S1.** Sample characteristics by diabetes.

|                                                    | <b>Total</b><br><b>N=2,536</b> | <b>No</b><br><b>N=2,123</b> | <b>Yes</b><br><b>N=413</b> | <b>P-</b><br><b>value</b> |
|----------------------------------------------------|--------------------------------|-----------------------------|----------------------------|---------------------------|
| Sex                                                |                                |                             |                            | 0.073                     |
| Male                                               | 1,275<br>(50.3%)               | 1,084<br>(51.1%)            | 191<br>(46.2%)             |                           |
| Female                                             | 1,261<br>(49.7%)               | 1,039<br>(48.9%)            | 222<br>(53.8%)             |                           |
| Age (years)                                        | 39.4 (11.1)                    | 37.5 (10.3)                 | 49.2 (9.8)                 | <0.001                    |
| RECODE of education                                |                                |                             |                            | <0.001                    |
| Low                                                | 251 ( 9.9%)                    | 143 ( 6.7%)                 | 108<br>(26.2%)             |                           |
| Medium                                             | 707<br>(27.9%)                 | 609<br>(28.7%)              | 98<br>(23.7%)              |                           |
| High                                               | 1,576<br>(62.2%)               | 1,369<br>(64.5%)            | 207<br>(50.1%)             |                           |
| BMI (kg/m <sup>2</sup> )                           | 29.0 (5.6)                     | 28.5 (5.5)                  | 31.4 (5.6)                 | <0.001                    |
| RECODE of bmi                                      |                                |                             |                            | <0.001                    |
| Normal                                             | 603<br>(23.8%)                 | 564<br>(26.6%)              | 39 ( 9.4%)                 |                           |
| Overweight                                         | 944<br>(37.2%)                 | 797<br>(37.5%)              | 147<br>(35.6%)             |                           |
| Obese                                              | 989<br>(39.0%)                 | 762<br>(35.9%)              | 227<br>(55.0%)             |                           |
| Waist circumference (cm)                           | 89.2 (13.5)                    | 87.6 (13.1)                 | 97.3 (12.5)                | <0.001                    |
| ABSI z score                                       | 0.0 (1.0)                      | -0.0 (1.0)                  | 0.3 (1.0)                  | <0.001                    |
| Total mass (kg)                                    | 79.3 (16.3)                    | 78.5 (16.2)                 | 83.3 (16.3)                | <0.001                    |
| Total fat (kg)                                     | 30.9 (10.7)                    | 30.2 (10.5)                 | 34.1 (11.1)                | <0.001                    |
| Trunk fat (kg)                                     | 16.2 (6.4)                     | 15.6 (6.2)                  | 19.1 (6.7)                 | <0.001                    |
| Total visceral fat (kg)                            | 1.0 (0.7)                      | 0.9 (0.7)                   | 1.5 (0.8)                  | <0.001                    |
| Leisure time physical activity (MET<br>hours/week) | 18.2 (38.6)                    | 19.2 (40.2)                 | 13.0 (28.7)                | 0.003                     |
